# Supplementary material for: Cuba’s agrifood system in transition, an introduction to the Elementa Special Feature
Source: Oxford University Press journal article supplement (doi:10.1525/elementa.335), 2018-01-01
Supplement: elementa-6-335-s1.pdf [file elementa-6-335-s1.pdf]

**Para Citar:** Fernandez, M., Nelson, E., Locke, K., Figueroa, G. and Funes-Aguilar, F., 2018. Cuba's agrifood system in transition, an introduction to the *Elementa* Special Feature. *Elem Sci Anth*, 6(1), p.75. DOI: <http://doi.org/10.1525/elementa.335>

## **El sistema agroalimentario cubano en transición: Una introducción a la publicación especial de *Elementa***

**Autores:** Margarita Fernández<sup>1</sup>, Erin Nelson<sup>2</sup>, Kim A. Locke<sup>3</sup>, Galia Figueroa<sup>4</sup>, Fernando Funes Aguilar<sup>5</sup>

**Afiliaciones:** <sup>1</sup>Red de Agroecología Cuba-EE.UU. y Vermont Caribbean Institute, Burlington, VT, EE.UU.; <sup>2</sup>University of Guelph, Guelph, ON, Canadá; <sup>3</sup>Dartmouth, Hanover, NH, EE.UU.; <sup>4</sup>Universidad de Bonn, Bonn, Alemania; <sup>5</sup>Estación Experimental de Pastos y Forrajes Indio Hatuey, Matanzas, Cuba

### **Resumen:**

La experiencia de Cuba en la agricultura sostenible y la agroecología ha recibido una importante atención internacional, en especial porque los defensores de la agroecología buscan demostrar la factibilidad de implementar alternativas a la agricultura industrial a una escala nacional para respaldar la resiliencia ecológica, la seguridad y la soberanía alimentarias y el bienestar humano. Esa atención ha aumentado desde que las relaciones entre Estados Unidos (EE.UU.) y Cuba empezaron a normalizarse, y se está especulando actualmente sobre cómo afectará esto a los avances de Cuba en materia de sostenibilidad. Este breve artículo de introducción presenta un resumen de la publicación especial *El sistema agroalimentario cubano en transición*, que tiene el fin de contribuir al conjunto de publicaciones que analizan los matices del desarrollo agroecológico en Cuba, con un énfasis en amplificar las voces de los protagonistas basados a nivel local al invitar a que contribuyan académicos cubanos y publicar en español e inglés. Presentamos el proceso, los desafíos y los objetivos de este esfuerzo único y destacamos la presentación de los siete primeros artículos, todos procedentes de Cuba a excepción de uno, que es una colaboración entre académicos y profesionales basados en EE.UU. y Cuba. Mediante el análisis de algunas de las complejidades de la transición del sistema agroalimentario cubano y la presentación de estudios detallados y rigurosos sobre sus éxitos y desafíos, esta publicación tiene el fin de mejorar el entendimiento de los lectores sobre el camino para lograr la sostenibilidad del sistema agroalimentario conforme a la evolución del mismo en Cuba. Con esto, esperamos subrayar el valor instructivo del caso de Cuba y generar nuevas oportunidades de colaboración, ya que académicos y ciudadanos de todo el mundo están tratando de desarrollar sistemas agroalimentarios que sustenten a la sociedad por mucho tiempo.

### **Introducción**

Cuba es la isla más grande del Caribe en términos geográficos y tiene mucho peso en los debates sobre la economía política mundial. Aplaudido como un modelo de antiimperialismo o vilipendiado como un Estado represivo de partido único, en general Cuba suele suscitar fuertes

opiniones. En este cargado contexto, en los últimos años Cuba se ha labrado una buena reputación de otra forma, y hoy en día es bien conocida por su historia única de transición hacia la agricultura y los sistemas alimentarios (agroalimentarios) sostenibles. El caso cubano se cita con frecuencia como un ejemplo importante para el planeta de cómo puede gestionarse un cambio del modelo dominante de producción alimentaria industrial hacia alternativas más sostenibles, sobre la base de los principios de la agroecología (véase Altieri y Funes Monzote, 2012; Funes Aguilar y Vásquez Moreno, 2016; Funes Aguilar et al., 2002; Rosset y Benjamin, 1994).

La mayor parte de la literatura, tanto popular como académica, enmarca la transición del sistema agroalimentario cubano en el contexto del colapso de la Unión Soviética a principios de la década de 1990. Ese significativo cambio geopolítico llevó a un declive repentino y pronunciado en la capacidad de Cuba para importar los insumos necesarios para su producción agrícola industrializada, incluidos fertilizantes y plaguicidas químicos, petróleo, piezas de maquinas, equipos de riego, piensos y otros insumos. Unido a una reducción drástica de las importaciones de alimentos subsidiadas, esto provocó una grave crisis en la productividad agrícola y la seguridad alimentaria de la isla, a la que Cuba respondió con la adopción de un modelo de sistema agroalimentario sostenible en las políticas y en la práctica. Por ejemplo, el país invirtió en investigación y desarrollo sobre las alternativas ecológicas a los agroquímicos, fortaleció su cabaña nacional de bueyes para ayudar a reemplazar los tractores y, tal vez el elemento más conocido, incentivó la producción alimentaria ecológica en sus organopónicos urbanos y periurbanos y difundió la agroecología en las zonas rurales por medio del Movimiento Agroecológico de Campesino a Campesino de la Asociación Nacional de Agricultores Pequeños (ANAP).

La experiencia de Cuba ha recibido mucha atención internacional, en especial teniendo en cuenta que los defensores de la agroecología buscan demostrar la factibilidad de implementar alternativas a la agricultura industrial a una escala nacional para respaldar la resiliencia ecológica, la seguridad y la soberanía alimentarias y el bienestar humano. Esa atención se ha incrementado desde el anuncio en diciembre de 2014 por los entonces presidentes Barack Obama y Raúl Castro de que las relaciones diplomáticas entre EE.UU. y Cuba iniciarían un proceso de normalización. Aunque la Administración Trump ha llevado a cabo un cambio en la política de EE.UU. hacia la retórica y la hostilidad de la época de la Guerra Fría, actualmente es inevitable cierto nivel de apertura y de nuevas colaboraciones, aunque sea lentamente, con varios acuerdos comerciales ya en marcha, incluido en el sector agroalimentario (Fernández et al. 2018). Esto ha acarreado una intensa especulación sobre la medida en que pueden mantenerse o se mantendrán los esfuerzos cubanos para la transición hacia sistemas alimentarios más sostenibles ante el nuevo acceso a los mercados y la inversión de EE.UU. (Fernández et al. 2018; Altieri, 2016).

### **Objetivos y contexto de esta publicación especial**

Los artículos presentados en esta publicación especial se escribieron en un momento en que Cuba se encuentra en el umbral de cambios sustanciales, tanto a nivel interno como con respeto a su posicionamiento geopolítico, y entonces es un momento especialmente importante para examinar atentamente la transición del sistema agroalimentario del país. Si bien algunos elementos de esa transición pueden ser actualmente de conocimiento relativamente común, como explican Fernández et al. (2018), el caso de Cuba es “quizás tan ampliamente conocido como es

malentendido”. Opiniones sobre el sistema agroalimentario cubano frecuentemente refleja las opiniones polarizadas de la economía política de Cuba en general, tiende a entenderse como una utopía ecológica de soberanía alimentaria o como un sector atrasado y subdesarrollado que requiere desesperadamente ser modernizado y revitalizado por medio de inversión extranjera. Esta publicación especial pretende presentar una perspectiva más equilibrada, contribuyendo al cuerpo de literatura que analiza los matices del desarrollo agroecológico en Cuba, destacando las importantes innovaciones que se han aplicado y examinando algunos de los desafíos significativos que se siguen afrontando.

En nuestro esfuerzo por alcanzar estos objetivos, la publicación especial invita de manera específica a académicos y profesionales cubanos que viven en la isla a presentar manuscritos. Se invita también a otros autores a que envíen contribuciones. No obstante, nuestra inquietud central es amplificar las voces de los protagonistas de la transición del sistema alimentario de Cuba que viven en la isla y permitirles compartir directamente su trabajo con públicos internacionales anglófonos e hispanohablantes. A fecha de hoy, el número de publicaciones en inglés sobre este tema que han sido lideradas por autores cubanos ha sido limitado. En cambio, gran parte de lo que se ha publicado en inglés sobre la experiencia cubana ha sido escrito por investigadores y periodistas no cubanos o autores de descendencia cubana que viven fuera de Cuba (Rosset y Benjamin, 1995; Álvarez y Messina, 1996; *The Greening of Cuba*, 1996; Rosset, 1997; Deere, 1997; Altieri et al., 1999; Murphy, 1999; Enríquez, 2000; Messina, 2001; Enríquez, 2003; Royce, 2004; McKibben, 2005; Claussen, 2007; Wright, 2009; Koont, 2011; Chan y Roach, 2013; Gürcan, 2014; Graddy-Lovelace, 2018). Publicaciones como estas han desempeñado una función importante para comunicar los éxitos y las lecciones del caso cubano a públicos mundiales. No obstante, es importante que los lectores en inglés tengan un mejor acceso al trabajo de las personas más estrechamente implicadas en la transición del sistema agroalimentario de Cuba, en concreto los investigadores y profesionales que impulsan y monitorean sus avances y que, como ciudadanos y residentes, participan en ella a diario.

Hasta la fecha, la publicación más destacada en inglés que recalca el trabajo de tales autores es el volumen titulado *Sustainable Agriculture and Resistance: Transforming Food Production in Cuba* (La agricultura sostenible y la resistencia: transformando el campo cubano), editado conjuntamente por varios importantes agroecólogos cubanos (entre ellos, Fernando Funes Aguilar, coeditor de esta publicación especial, y otros autores que también presentan contribuciones en ella) (Funes Aguilar et al., 2002). Esa recopilación fue publicada por la organización sin fines de lucro Food First, con sede en California, que ha desempeñado una función esencial a la hora de sensibilizar en los EE.UU., y en el mundo anglófono de manera más general, sobre la agroecología en Cuba. También ha habido varios artículos en revistas académicas redactados en inglés por autores cubanos revisados (Febles González et al., 2011; Funes Monzote et al., 2009a; Funes Monzote et al., 2009b) y otros que han sido el resultado de esfuerzos compartidos entre investigadores cubanos y extranjeros (Deere et al., 1994; Altieri et al., 1999; Nelson et al., 2009; Simón Reardon y Pérez, 2010; Rosset et al., 2011; McCune et al., 2011; Altieri y Funes Monzote, 2012).

Es importante ser explícitos con respecto a algunos de los motivos por los que las publicaciones en inglés de autores cubanos sobre la transición del sistema agroalimentario cubano siguen siendo minoría. En primer lugar, esta dinámica no es exclusiva de Cuba, sino que gran parte de

las publicaciones más citada sobre una variedad de cuestiones que atañen al Sur Global la publican investigadores del Norte Global, o que al menos trabajan en instituciones que se encuentran en él (Canagarajah, 2002; Salager-Meyer, 2008). En parte, esto es producto de desequilibrios de poder más generalizados entre el Norte y el Sur Global, puesto que los procesos de producción y difusión del conocimiento reflejan relaciones de desigualdad imperialistas-coloniales profundamente arraigadas (Escobar, 1998; Mebler, 2015). Tales desigualdades contribuyen a varios problemas estructurales que repercuten negativamente en las oportunidades de publicación para autores del Sur Global (véase Canagarajah, 1996 y 2002; Salager-Meyer, 2008 y 2014).

Pudimos experimentar de primera mano algunos de estos problemas durante el proceso de invitar, gestionar el arbitraje y en la edición de los artículos para esta publicación especial. Por ejemplo, el acceso limitado a Internet en Cuba, en especial a conexiones fiables de alta velocidad, demostró ser un elemento problemático por varios motivos. Incluso los investigadores de las instituciones más destacadas hacen frente regularmente a la lentitud del acceso a Internet o a cortes totales, lo que provoca que no puedan utilizar la plataforma editorial en línea de Elementa, ralentiza la comunicación por correo electrónico con los editores y hace que sea difícil realizar investigaciones en línea, como por ejemplo encontrar y descargar artículos u otros datos. La incorporación en sus discusiones de artículos de publicaciones revisados por pares destacados fue especialmente problemática para los autores cubanos que publican aquí, puesto que la mayoría de la investigación revisada por pares de alta calidad solo es accesible por medio de suscripciones cuyas cuotas están fuera del alcance de las instituciones cubanas donde estos autores realizan su trabajo. Un problema relacionado con esto fue que los estilos de redacción de los artículos, incluida la estructura de los documentos y las normas bibliográficas, no siempre estuvieron a las expectativas editoriales, lo que supone otro desafío que afecta en gran medida a autores de fuera del mundo occidental que tratan de publicar en las principales publicaciones internacionales (Canagarajah 1996, 2002).

Si bien no fue un desafío que afrontamos directamente en nuestro trabajo en esta publicación especial, es importante reconocer otros obstáculos relacionados con los recursos que hacen que sea difícil para los académicos cubanos realizar investigaciones que son un precursor necesario para publicar. El Gobierno de Cuba es bien conocido por valorar la educación e invertir en ella. No obstante, los fondos destinados a la investigación son escasos y se canalizan principalmente a proyectos que el Estado considera que tienen el mayor valor social posible (Reardon, 2016). Esto deja a muchos investigadores sin fondos para comprar equipos o sufragar los costos de viaje que conlleva el trabajo de campo. Estos desafíos son comunes en todo el Sur Global, pero en el caso de Cuba se ven exacerbados por las sanciones económicas de EE.UU. que crean barreras adicionales para, por ejemplo, la importación y el suministro de equipos científicos y la participación en investigación internacional colaborativa (Reardon, 2016). Estas limitaciones para el sector de la investigación del país hacen que encontrar datos fiables sobre una variedad de temas puede ser casi imposible (Mesa Lago y Pérez López, 2005), y esta falta de datos básicos crea un grave impedimento para los cubanos que quieren realizar investigación de alta calidad en la isla.

Los efectos del bloqueo de EE.UU. contra Cuba tienen otras repercusiones, también con respecto a la investigación y, de forma más específica, la publicación. Uno de los efectos más específicos

se deriva de la interpretación conservadora de los editores con sede en EE.UU. del lenguaje de sanciones sobre la capacidad legal de los autores cubanos para publicar con entidades de EE.UU. Según se autorizan bajo la licencia 31 C.F.R. 515.577 de la Oficina de Control de Activos Extranjeros (OFAC), no se permiten transacciones de publicaciones de autores cubanos que son “empleados gubernamentales”. No obstante, este lenguaje es vago, ya que la mayoría de las instituciones académicas y de investigación a nivel mundial son instituciones gubernamentales, como ocurre en Cuba. Esta falta de claridad ha provocado que editores con sede en EE.UU. rechacen a autores cubanos por temor a incumplir esta normativa (Roman, 2018). Elsevier ha liderado las críticas de este reglamento de OFAC y ha logrado obtener de ella una aclaración explícita de que los empleados gubernamentales de países sancionados están autorizados a publicar si proceden de una institución académica o de investigación (Seeley, 2015).

Otro obstáculo significativo que limita las oportunidades de publicación para los autores cubanos es que, como hablantes no nativos de inglés, tienden a verse perjudicados por un sistema de publicación académica mundial fuertemente dominado por el inglés. La prioridad que el país da a la educación y la investigación ha resultado en una comunidad académica sólida que publica ampliamente a nivel nacional, incluido en revistas y publicaciones revisadas por pares. No obstante, muchos autores renuncian a públicos más internacionales y a publicaciones más leídas para publicar en su lengua materna. Un examen rápido de la literatura citada de los artículos de esta publicación especial brindará a los lectores una idea de algunos de los canales de publicación cubanos más utilizados, muchos de los cuales son gestionados por centros de investigación en el país. Lamentablemente, la mayoría de estas publicaciones no están incluidas en índices académicos como Web of Science y, por lo tanto, no son fáciles de obtener para investigadores que trabajan fuera de Cuba. Además, la mayoría solo están disponibles en español. Como resultado, la rica y valiosa información que figura en ellas es en gran parte inaccesible para las personas que no hablan español. Canagarajah (1996, 2002) analiza cómo estas políticas de conocimiento pueden relegar a los hablantes no nativos de inglés a publicar en revistas periféricas, lo que repercute negativamente en el conjunto de la comunidad científica.

Esta publicación especial afrontó el problema de la lengua invitando a que se presentaran manuscritos en español o inglés y comprometiéndose con un proceso de revisión de pares y publicación completamente bilingüe, con lo que se facilita que los autores cubanos presenten contribuciones. Asimismo, nuestra capacidad para publicar los artículos en inglés y en español hará que sean accesibles a un público más amplio, tanto dentro como fuera de Cuba. El refuerzo de la diversidad lingüística ha sido recomendado como una estrategia para enriquecer el mundo de la publicación académica (Kuteeva, 2014), y la publicación bilingüe en particular ha sido definida como una forma de aumentar el impacto de las publicaciones de la comunidad de hablantes no nativos de inglés (Salager-Meyer, 2014). No obstante, si bien estamos entusiasmados con este prometedor enfoque, también somos conscientes de que permitir la revisión por pares y la publicación bilingües en una publicación en inglés supone un esfuerzo que requiere muchos recursos (Salager-Meyer, 2014) y complicado desde el punto de vista logístico que será difícil de realizar de forma continua o en una escala más amplia.

Además de apoyar el proceso de publicación bilingüe, el personal editorial de Elementa nos dio mucha flexibilidad en la preparación de esta publicación especial, por ejemplo, al aceptar contribuciones y revisiones directamente a través del correo electrónico, permitir cierto margen

con los plazos y prestar un apoyo significativo en relación con el cumplimiento de los requisitos de formato de los manuscritos. Como editores invitados, las relaciones que ya teníamos con muchos de los autores de la publicación especial también fueron un ingrediente esencial para el éxito. Esas relaciones recíprocas basadas en la confianza facilitaron nuestra capacidad para navegar colectivamente en el complejo proceso de publicación bilingüe. También pudimos aprovechar varias conferencias internacionales y viajes a Cuba para organizar reuniones presenciales entre los editores y los autores. Esas reuniones cara a cara fueron fundamentales para aclarar los mensajes de los revisores de pares, así como las expectativas editoriales de Elementa.

Nuestra integración en una comunidad de práctica dedicada a la transición del sistema agroalimentario de Cuba, junto con la apertura de Elementa a medios creativos, hizo posible igualmente que incluyéramos un conjunto de videos breves en esta publicación especial. Estos videos, producidos en colaboración con Americas Media Initiative y el director de documentales cubano Ernesto Pérez Zambrano, permiten a los lectores poner cara a los nombres de algunos de los autores que contribuyen a nuestra publicación, y presentan una imagen vibrante y atractiva de la transición agroecológica en Cuba que hace que sus lecciones sean accesibles a un público más amplio que solo con los artículos. En aras de alcanzar el objetivo de la accesibilidad, es importante subrayar que Elementa es una publicación de acceso libre que explícitamente fomenta una variedad de estilos de presentación, en particular artículos que crean puentes entre la práctica y la política. Al facilitar una autoría diversa que incluye a profesionales y académicos, y al hacer que todos los materiales que publica estén disponibles libremente, Elementa contribuye a un proceso de democratización del conocimiento en el que creemos profundamente y que nos complace y enorgullece respaldar. Este enfoque es especialmente apropiado para una publicación dedicada a la transición del sistema agroalimentario de Cuba porque, como analizan Miranda et al. (2018), la democratización del conocimiento ha desempeñado una función importante en la transición del país hacia un desarrollo agrícola más sostenible.

### **Visión general de los contenidos de la publicación especial**

En el momento de escribir esta introducción, la publicación especial incluye siete artículos y cinco videos que abordan un abanico de temas relacionados con la transición del sistema agroalimentario de Cuba. El artículo marco de Fernández et al. proporciona una síntesis detallada de la literatura y los datos más recientes sobre el sistema agroalimentario cubano, con un énfasis en el movimiento agroecológico del país. Asimismo, señala los avances desiguales de este movimiento y analiza sus éxitos y desafíos, en especial en un contexto de cambios en las relaciones geopolíticas con EE.UU. Este artículo, de autoría conjunta de destacados académicos y profesionales de dentro y fuera de Cuba, también es una reflexión sobre los esfuerzos de la Red de Agroecología Cuba-EE.UU. (CUSAN, por sus siglas en inglés) para fomentar la colaboración en la investigación y la acción en materia de agroecología entre estos dos países.

Sobre la base de un resumen de las políticas agroalimentarias relevantes que figura en el artículo de Fernández et al., la contribución de Nova y Figueroa profundiza en los elementos específicos relativos a cómo ha cambiado el entorno normativo agroalimentario de Cuba desde 2007 hasta ahora. Nova y Figueroa presentan una visión detallada de las legislaciones, las órdenes ejecutivas y las resoluciones fundamentales y describen los esfuerzos de Cuba encaminados a reducir la dependencia de las importaciones de alimentos, principalmente facilitando acceso a tierras

cultivables no utilizadas, pero también descentralizando la toma de decisiones e introduciendo reformas de mercado moderadas. Sugieren que estos esfuerzos han tenido un éxito limitado, presentan algunos análisis para explicar por qué y plantean propuestas para el futuro. Entre ellas figura un llamado a expandir los derechos de propiedad para los agricultores, seguir integrando los mecanismos de mercado en la economía cubana y adoptar un enfoque sistémico en las reformas (en oposición a uno centrado en cuestiones específicas).

Mientras que Fernández et al. y Nova y Figueroa hacen un fuerte énfasis en la economía política de la transición del sistema agroalimentario de Cuba, los artículos de Pérez et al. y Sánchez et al. proporcionan a los lectores información pormenorizada desde una perspectiva más agronómica. Pérez et al. presentan una descripción detallada de la evolución del control biológico en Cuba. Como una alternativa sostenible a los plaguicidas químicos, el uso de organismos vivos como parásitos y nematodos para manejar las poblaciones de plagas ha sido un pilar fundamental en el movimiento agroecológico cubano. Como líderes en este ámbito, Pérez y su equipo describen cómo se ha realizado ese trabajo en el pasado y formulan propuestas para su evolución futura, abogando por enfoques más holísticos basados en la conservación en materia de control biológico como una forma de maximizar la sostenibilidad.

El uso de la agroforestería también ha desempeñado una función importante en la transición hacia una producción alimentaria más sostenible, y el trabajo de Sánchez et al. examina y resume los resultados de más de 20 estudios sobre sistemas agrosilvopastoriles en los que la agroforestería ha sido integrada en las tierras de pastoreo del ganado. Argumentan que un enfoque agrosilvopastoril puede aumentar significativamente la producción de carne y leche y extraen conclusiones que tienen una pertinencia directa para la seguridad alimentaria en Cuba y más allá, en particular en casos en que las limitaciones de recursos pudieran estar restringiendo la productividad animal y en que la disponibilidad de proteínas en la dieta es una preocupación.

Todos los estudios examinados por Sánchez et al. fueron realizados por investigadores en la Estación Experimental de Pastos y Forrajes Indio Hatuey, una institución líder en investigación agroecológica situada en la provincia de Matanzas que forma parte de la amplia red de centros de investigación agrícola de Cuba. Miranda et al. utilizan esta estación experimental como estudio de caso para demostrar cómo han cambiado los enfoques de la investigación y la extensión en Cuba desde el inicio de la década de 1990. En el centro de estos cambios ha estado la transición de un modelo de investigación científica reduccionista y descendiente hacia un modelo más holístico y horizontal que concede más espacio a la complejidad y la innovación, e incluye un fuerte énfasis en aplicar los resultados de la investigación para contribuir al desarrollo rural sostenible al poner en práctica los principios de la agroecología y la soberanía alimentaria.

El artículo de Leyva y Lores presenta su trabajo en el desarrollo y la aplicación de un índice para medir la agrobiodiversidad en las fincas como herramienta para promover la sostenibilidad. Describen por qué es importante un índice de agrobiodiversidad para la agroecología y cómo llevaron a cabo el desarrollo de este índice, además de mostrar los resultados de su aplicación en fincas urbanas y suburbanas en cinco provincias cubanas. De manera similar, el artículo de Casimiro y Casimiro comparte el proceso de desarrollo de una herramienta para medir la resiliencia socioecológica a nivel de las fincas mediante el examen de 20 años de transición hacia la agroecología en su finca familiar, la Finca del Medio, situada en la provincia central de Sancti

Spíritus. Al evaluar cómo esta finca mixta de 10 hectáreas ha aumentado su resiliencia socioecológica gracias a la adopción de prácticas y principios agroecológicos, el artículo de Casimiro y Casimiro presenta un microcosmos de la transición del sistema agroalimentario de Cuba y elabora un argumento convincente, desde la perspectiva de los agricultores, sobre las posibilidades prácticas para el desarrollo sostenible del sistema alimentario.

Si bien el artículo de Casimiro y Casimiro ciertamente contribuye en gran medida a proporcionar a los lectores una imagen de la realidad de la vida en la finca en el contexto cubano, los videos incluidos en esta publicación especial realmente transportan a la audiencia a las fincas, los mercados, los centros de investigación agrícola y las comunidades de Cuba. Presentan a las personas fundamentales en el movimiento agroecológico cubano (incluidos autores que han contribuido a esta publicación) y dan vida a la investigación y la acción que están respaldando la transición del sistema agroalimentario del país. En el primer video aparecen el editor invitado Fernando Funes Aguilar y su hijo, el también agroecólogo Fernando Funes Monzote, cuya Finca Marta se ha convertido en un importante centro de práctica y aprendizaje de la agroecología. El segundo video destaca la función de liderazgo que la ANAP está desempeñando en el movimiento agroecológico cubano. El tercer video permite conocer la Estación Experimental de Pastos y Forrajes Indio Hatuey, a la que se hace referencia en varios artículos de la recopilación. El cuarto video hace énfasis en la cuestión de las relaciones de género, resaltando la función de las mujeres y la juventud en la transición del sistema agroalimentario de Cuba. En el último video de la recopilación los participantes comparten algunas reflexiones sobre el futuro del movimiento agroecológico cubano, incluida una discusión sobre nuevas oportunidades de mercado, como la entrada en el mercado orgánico certificado.

Los artículos que hemos presentado en esta publicación especial abordada varios aspectos de la experiencia de Cuba con la agroecología y las transiciones de los sistemas agroalimentarios. Hay muchos más temas que merecen ser explorados. Si bien uno de los videos de la publicación especial analiza las cuestiones de género, hay espacio para un examen más profundo de las formas en que se está abordando la equidad de género en el contexto de la transición hacia sistemas alimentarios más sostenibles. Esta cuestión se ha convertido en un elemento central para el Sistema de Innovación Agropecuaria Local, una iniciativa a la que se hace referencia en el artículo de Miranda et al. Ese proyecto sigue evolucionando, por ejemplo, mediante el desarrollo de más vínculos con las estructuras de gobierno locales, así como con el sector privado, y tiene un potencial importante para fundamentar las conversaciones en relación con procesos de gobernanza participativos y de múltiples partes interesadas. El Ministerio de Agricultura recientemente presentó una estrategia de género para todo el sector y sería muy positivo recibir una contribución en la que se analice dicha estrategia.

Otros temas a los que se alude en los artículos y videos de la publicación especial a los que merece la pena prestar más atención son: la función que pueden desempeñar las economías ecológicas a medida que la agroecología se integra en el nuevo modelo económico de Cuba; la estructura y la función de la cooperativa agrícola; el fitomejoramiento participativo; los procesos de aprendizaje horizontales de campesino a campesino; la relación entre el cambio climático, la agroecología y la resiliencia; y las posibles sinergias entre la transición sostenible del sistema alimentario y el desarrollo de energías renovables. Estos dos últimos temas apuntan a las



intersecciones entre los sistemas alimentarios y el cambio climático, y el ejemplo cubano proporciona abundantes oportunidades para la investigación sobre los efectos de la crisis climática (dado que el país experimenta sequías y huracanes cada vez más graves y patrones meteorológicos menos predecibles) y sobre cómo pueden contribuir las prácticas agroecológicas a la adaptación al cambio climático y la mitigación de los efectos del mismo.

### **Observaciones finales**

Esta publicación especial forma parte del dominio de las Transiciones Hacia la Sostenibilidad de Elementa, que tiene el fin de compartir conocimientos que pueden contribuir directamente a los esfuerzos para encaminar nuestro mundo hacia una mayor sostenibilidad. En lugar de centrarse en la definición de problemas, este dominio busca contribuciones orientadas a soluciones de académicos y profesionales de distintos espacios disciplinarios y geográficos “quienes están avanzando con estrategias para provocar un cambio hacia la sostenibilidad”. En su trabajo para construir sistemas alimentarios más sostenibles y promover la agroecología, muchos agricultores, investigadores y otras personas de Cuba están haciendo justo eso. Como aclaran las contribuciones que por ahora conforman esta publicación especial, frente a circunstancias complicadas, los cubanos están trabajando arduamente para encontrar y aplicar soluciones que ayuden al país en la transición hacia sistemas agroalimentarios más sostenibles. Entre estas soluciones están las reformas políticas y económicas (como analizan los artículos de Fernández et al. y Nova y Figueroa), las innovaciones en las prácticas agronómicas (por ejemplo, el control de plagas con organismos vivos en lugar de químicos, como plantean Pérez et al., y la incorporación de árboles en los pastos de los animales como presentan Sánchez et al.) y los cambios en los enfoques de investigación y extensión (como relatan Miranda et al. y Leyva y Lores). Estas innovaciones pueden ponerse en práctica para ayudar a construir resiliencia socioecológica en las fincas y, por extensión, en las comunidades, como demuestran Casimiro y Casimiro.

Empezamos este artículo de introducción señalando la medida en que pueden conocerse algunos de los elementos básicos de la transición del sistema agroalimentario de Cuba. Mediante el análisis de algunas de las complejidades de esta transición y la presentación de estudios detallados y rigurosos sobre sus éxitos y desafíos, esta publicación especial tiene el fin de mejorar el entendimiento de los lectores sobre el camino para lograr la sostenibilidad del sistema agroalimentario conforme a la evolución del mismo en Cuba. Con esto, esperamos subrayar el valor instructivo del caso de Cuba y generar nuevas oportunidades de colaboración, ya que académicos y ciudadanos de todo el mundo están tratando de desarrollar sistemas agroalimentarios que sustenten a la sociedad por mucho tiempo.

### **Referencias**

Altieri, MA, Companioni, N, Cañizares, K, Murphy, C, Rosset, P, Bourque, M, Nicholls, CI. 1999. The greening of the “barrios”: Urban agriculture for food security in Cuba. *Agriculture and Human Values* 16(2): 131-140.

Altieri, MA, Funes-Monzote, FR. 2012. The paradox of Cuban agriculture. *Monthly Review* 63(8): 22-33.

Altieri, MA. 2016. Cuba's sustainable agriculture at risk in U.S. thaw. *The Conversation*. Available at <https://theconversation.com/cubas-sustainable-agriculture-at-risk-in-u-s-thaw-56773>.

Alvarez, J, Messina Jr, WA. 1996. Cuba's new agricultural cooperatives and markets: antecedents, organization, early performance and prospects. *Cuba in Transition* 6: 175-195.

Canagarajah, AS. 1996. "Nondiscursive" requirements in academic publishing, material resources of periphery scholars, and the politics of knowledge production. *Written Communication* 13(4): 435-472.

Canagarajah, AS. 2002. *The geopolitics of academic writing*. Pittsburgh, PA: University of Pittsburgh.

Chan, ML, Roach, EFF. 2013. *Unfinished puzzle: Cuban agriculture: the challenges, lessons & opportunities*. Oakland, CA: Food First Books.

Clausen, R. 2007. Healing the rift: Metabolic restoration in Cuban agriculture. *Monthly Review* 59(1): 40-52.

Deere, CD, Pérez, N, Gonzales, E. 1994. The view from below: Cuban agriculture in the 'special period in peacetime'. *The Journal of Peasant Studies* 21(2): 194-234.

Deere, CD. 1997. Reforming Cuban agriculture. *Development and Change* 28(4): 649-669.

Enríquez, LJ. 2000. Cuba's new agricultural revolution: The transformation of food crop production in Cuba. Oakland, CA: Food First. Development Report No. 14. Available at: <https://foodfirst.org/publication/cubas-new-agricultural-revolution-the-transformation-of-food-crop-production-in-contemporary-cuba/>

Enríquez, LJ. 2003. Economic reform and repeasantization in post-1990 Cuba. *Latin American Research Review* 38(1): 202-218.

Escobar, A. 1998. *La invención del Tercer Mundo: Construcción y deconstrucción del desarrollo*. Santafé de Bogotá: Grupo Editorial Norma.

Febles-González, JM, Tolón-Becerra, A, Lastra-Bravo, X, Acosta-Valdés, X. 2011. Cuban agricultural policy in the last 25 years. From Conventional to organic agriculture. *Land Use Policy* 28(4): 723-735.

Fernandez, M, Williams, J, Figueroa, G, Graddy-Lovelace, G, Machado, M, Vasquez, L, Perez, N, Casimiro, L, Romero, G, Funes Aguilar, F. 2018. New Opportunities, New Challenges:

Harnessing Cuba's Advances in Agroecology and Sustainable Agriculture in the Context of Changing Relations with the United States. *Elem Sci Anth*, X(X): XX.

Funes-Aguilar, F, Vázquez Moreno, LL eds. 2016. *Avances de la agroecología en Cuba*. Matanzas, Cuba: Estación Experimental de Pastos y Forrajes Indio Hatuey.

Funes-Monzote, FR, Monzote, M, Lantinga, EA, Ter Braak, CJF, Sánchez, JE, Van Keulen, H. 2009a. Agro-ecological indicators (AEIs) for dairy and mixed farming systems classification: identifying alternatives for the Cuban livestock sector. *Journal of Sustainable Agriculture* 33(4): 435-460.

Funes-Monzote, FR, Monzote, M, Lantinga, EA, Van Keulen, H. 2009b. Conversion of specialised dairy farming systems into sustainable mixed farming systems in Cuba. *Environment, development and sustainability* 11(4): 765-783.

Funes-Aguilar, F, Garcia, L, Bourque, M, Pérez, N, Rosset, P eds. 2002. *Sustainable agriculture and resistance: Transforming food production in Cuba*. Oakland, CA: Food First Books, ACTAF and CEAS.

Graddy-Lovelace, G. 2018. United States-Cuba agricultural relations and agrarian questions. *Journal of Agrarian Change* 18(1): 43-66.

*The Greening of Cuba*. 1996. Director Jamie Kibben. Oakland, CA: Food First DVD.

Gürçan, E. 2014. Cuban agriculture and food sovereignty: Beyond civil-society-centric and globalist paradigms. *Latin American Perspectives* 41(4): 129-146.

Koont, S. 2011. *Sustainable urban agriculture in Cuba*. Gainesville, FL: University Press of Florida.

Kuteeva, M. 2014. Writing for publication in multilingual contexts: An introduction to the special issue, *Journal of English for Academic Purposes* 13: 1-4.

McKibben, B. 2005. The Cuba Diet: What will you be eating when the revolution comes? *Harper's Magazine* April: 61-69.

Melber, H. 2015. Knowledge is power and power affects knowledge: Challenges for research collaboration in and with Africa. *Africa Development* 40(4): 21-42.

Mesa-Lago, C, Pérez-López, JF. 2005 *Cuba's aborted reform: Socioeconomic effects, international comparisons, and transition policies*. Gainesville, FL: University Press of Florida.

Messina, WA. 2001. *Agricultural reform in Cuba: Implications for agricultural production, markets and trade*. Gainesville, FL: University of Florida Cooperative Extension Service, Institute of Food and Agriculture Sciences, EDIS. Available at: <http://edis.ifas.ufl.edu/fe159>

Miranda Tortoló, T, Machado Martínez, H, Suset Pérez, A, Lamela López L, Oropesa Casanova, K, Alfonso Yanes, J, García Naranjo, MA, Campos Acosta, IM. 2018. From technology transfer to innovation-based rural development: A necessary turn at the Indio Hatuey Experimental Station. *Elem Sci Anth*, X(X): XX.

Murphy, C. 1999. *Cultivating Havana: Urban agriculture and food security in the years of crisis*. Oakland, CA: Food First. Development Report No. 12. Available at: <https://foodfirst.org/publication/cultivating-havana-urban-agriculture-and-food-security-in-the-years-of-crisis/>

Nelson, E, Scott, S, Cukier, J, Leyva Galán, A. 2009. Institutionalizing agroecology: Successes and challenges in Cuba. *Agriculture and Human Values* 26(3): 233-243.

Reardon, S. 2016. Cuban science at a crossroads. *Nature News* 537: 600-603. Available at: <https://www.nature.com/news/can-cuban-science-go-global-1.20694>

Roman, J. 2018. The ecology and conservation of Cuba's coastal and marine ecosystems. *Bulletin of Marine Science* 94(2): 149-169. Available at: <http://www.joeroman.com/wordpress/wp-content/uploads/2018/04/roman-intro.pdf>

Rosset, P, Benjamin, M (eds.). 1994. *The Greening of the Revolution: Cuba's Experiment with Organic Agriculture*. Melbourne: Ocean Press.

Rosset, P. 1997. Cuba: Ethics, biological control, and crisis. *Agriculture and Human Values* 3: 291-302.

Rosset, PM, Machín Sosa, B, Roque Jaime, AM, Ávila Lozano, DR. 2011. The Campesino-to-Campesino agroecology movement of ANAP in Cuba: Social process methodology in the construction of sustainable peasant agriculture and food sovereignty. *Journal of Peasant Studies* 38(1): 161–191.

Royce, F.S., 2004. Agricultural production cooperatives: the future of Cuban agriculture. *Transnational Law and Contemporary Problems* 14, p.19.

Salager-Meyer, F. 2008. Scientific publishing in developing countries: Challenges for the future. *Journal of English for Academic Purposes* 7(2): 121-132.

Salager-Meyer, F. 2014. Writing and publishing in peripheral scholarly journals: How to enhance the global influence of multilingual scholars? *Journal of English for Academic Purposes* 13: 78-82.

Seeley M. 2015. How sanctions laws affect publishing: OFAC provides new guidance [Online]. Elsevier Connect. 8 December, 2015. Available from: <https://www.elsevier.com/connect/how-sanctions-laws-affect-publishing-ofac-provides-new-guidance>

Simon-Reardon, JA, Aleman Perez, R. 2010. Agroecology and the development of indicators of food sovereignty in Cuban food systems. *Journal of Sustainable Agriculture* 34(8): 907-922.

Wright, J. 2009. *Sustainable agriculture and food security in an era of oil scarcity: Lessons from Cuba*. London: Earthscan.

### **Contribuciones**

Contribuyeron a la concepción y al diseño: MF, EN, KAL, GF, FFA

Redactaron o revisaron el artículo: EN, MF, KAL, GF, FFA

Aprobaron la versión presentada para publicación: MF, EN, KAL, GF, FFA

### **Agradecimientos**

Queremos expresar nuestro agradecimiento a Alex Halkin de Americas Media Initiative y Ernesto Pérez Zambrano por coordinar el componente de video de esta publicación especial, y a todos los revisores de pares por su trabajo. También queremos dar las gracias a los traductores que fueron indispensables para asegurar la accesibilidad de esta publicación especial para públicos anglófonos e hispanohablantes: Natalia Fernández, Rose Ana Berbeo, Nils McCune, Michael Packard, Rodrigo Ginés Salguero y Katie Whiddon.

### **Información sobre la financiación**

Dartmouth College hizo posible la financiación de esta publicación especial. La Red de Agroecología Cuba-EE.UU., que recibe financiación de la Fundación Ford, la Fundación Flora Family y la Fundación Christopher Reynolds, también contribuyó a la financiación de esta publicación.

### **Conflicto de intereses**

Los autores declaran que no existe ningún conflicto de intereses.
